# Supplementary material
Source: publisher figshare collection journal article supplement (https://frontiersin.figshare.com/ndownloader/files/34041467)
Supplement: Supplementary file 1 [file 34041467]

## Sheet: Martinique
		XRF													ICP-MS TRACES
		NORMALISED TO 100%, VOLATILE FREE
Sample	Type	SiO2	Al2O3	Fe2O3	MgO	P2O5	MnO	CaO	Na2O	K2O	TiO2	Sum		45Sc	49Ti	51V	53Cr	55Mn	59Co	60Ni	63Cu	65Cu	66Zn	71Ga	85Rb	88Sr	89Y	90Zr	93Nb	133Cs	137Ba	139La	140Ce	141Pr	143Nd	147Sm	149Sm	151Eu	153Eu	157Gd	159Tb	161Dy	163Dy	165Ho	166Er	167Er	169Tm	172Yb	174Yb
MQ42	Cumulate	40.325	22.4654	13.1836	6.38764	0.0150842	0.112628	15.4864	0.814545	0.110617	1.09913	100		42.34	1.37	741.9	7.982	0.108	45.12	12.72	21.38	24.76	60.63	18.61	1.8	306.6	6.337	6.673	0.144	0.158	21.18	0.768	1.616	0.325	1.793	0.69	0.688	0.361	0.356	1.006	0.177	1.123	1.11	0.233	0.625	0.607	0.091	0.549	0.543
MQ12	Cumulate	40.8186	20.2733	15.1672	6.82223	0.204445	0.250773	13.3343	1.36968	0.120854	1.63858	100		52.99	1.55	515.3	9.291	0.233	39.87	9.567	22.36	26.26	121.3	20.16	0.805	329.9	28.21	13.07	1.622	0.068	22.74	2.597	8.444	1.755	10.48	3.605	3.626	1.198	1.192	4.929	0.814	5.003	4.963	1.045	2.798	2.779	0.412	2.494	2.507
MQ28	Cumulate	44.2583	24.0233	5.83295	8.3325	0.0130289	0.0962136	16.4164	0.681513	0.0902002	0.255567	100		40.73	0.303	134.7	169.7	0.095	35.16	37.36	7.436	9.878	30.07	12.84	0.502	381.5	4.01	5.537	0.141	0.018	17.08	1.205	2.352	0.347	1.728	0.523	0.529	0.292	0.289	0.709	0.12	0.713	0.727	0.153	0.399	0.398	0.058	0.352	0.351
MQ43	Cumulate	42.5927	22.4346	12.2453	6.13868	0.0290838	0.186537	14.5519	0.962773	0.120347	0.738126	100		22.68	0.904	425.1	1.179	0.178	33.04	4.671	25.44	28.27	77.54	18.29	1.174	336.4	6.082	10.27	0.329	0.117	21.47	1.336	3.095	0.514	2.542	0.784	0.771	0.405	0.408	1.001	0.167	1.036	1.044	0.221	0.601	0.601	0.092	0.582	0.585
MQ44	Cumulate	42.9866	26.3398	7.04402	6.64165	0.0140479	0.0852908	15.6534	0.742532	0.120411	0.372269	100		21.14	0.45	281.8	17.8	0.083	35.65	28.36	13.76	16.55	35.19	13.5	1.102	371.1	3.418	5.042	0.144	0.041	15.13	0.532	1.317	0.226	1.195	0.393	0.401	0.214	0.215	0.553	0.093	0.581	0.589	0.125	0.336	0.331	0.05	0.303	0.304
MQ48	Cumulate	43.5537	29.0391	4.07724	6.11984	0.0109657	0.0548284	16.1893	0.667909	0.109657	0.177445	100		12.63	0.203	87.77	10.02	0.054	28.71	35.91	33.37	35.3	18.86	12.35	2.867	341.7	2.124	2.749	0.093	0.111	11.78	0.427	0.947	0.156	0.774	0.246	0.256	0.176	0.178	0.347	0.06	0.366	0.359	0.079	0.211	0.199	0.031	0.191	0.19
MQ10	Cumulate	43.6697	22.7364	7.98848	7.75174	0.0201475	0.0936858	14.345	1.91401	0.32236	1.15848	100		70.36	1.098	461.2	9.024	0.09	34.6	20.84	30.92	34.41	35.08	14.28	2.611	339.5	13.24	12.93	0.433	0.155	41.44	1.193	3.097	0.623	3.607	1.403	1.429	0.602	0.595	2.173	0.376	2.338	2.343	0.504	1.325	1.31	0.191	1.159	1.148
MQ61	Cumulate	40.4264	22.8285	12.8067	7.22285	0.0159709	0.127767	14.9528	0.638837	0.0798547	0.900361	100		36.68	1.119	584.3	14.79	0.123	46.62	14.57	10.79	13.83	59.31	17.2	0.355	347.5	3.895	5.049	0.191	0.014	10.83	0.901	1.97	0.332	1.668	0.507	0.508	0.274	0.274	0.686	0.111	0.694	0.695	0.143	0.377	0.378	0.054	0.334	0.336
MQ59	Cumulate	39.8947	24.0215	11.7889	6.79098	0.0110931	0.0826938	14.6025	1.36142	0.201692	1.24444	100		51.7	1.312	801.7	5.503	0.083	48.05	22.87	74.01	75.83	55.48	18.77	1.435	288	8.181	6.356	0.22	0.048	19.75	0.502	1.484	0.305	1.92	0.834	0.829	0.416	0.407	1.321	0.229	1.439	1.458	0.309	0.815	0.808	0.115	0.664	0.666
MQ30	Cumulate	43.5736	23.0287	8.03492	7.08058	0.0231293	0.0935228	15.2452	1.58888	0.261462	1.06998	100		68.15	1.309	463	24.06	0.089	33	22.51	37.79	40.62	36.85	14.47	1.406	333.7	11.5	11.62	0.395	0.042	33.63	1.039	2.837	0.546	3.135	1.223	1.231	0.499	0.496	1.87	0.321	2.011	2.006	0.432	1.132	1.135	0.17	1.005	1.01
MQ45	Cumulate	48.8091	26.1259	5.8314	2.19104	0.164604	0.0923389	13.0981	2.77017	0.210774	0.706593	100		14.31	0.847	274.8	10.29	0.085	15.83	11.69	16.92	19.35	55.59	22.73	2.083	289.2	13.3	15.32	2.223	0.119	87.37	6.474	13.57	1.955	8.868	2.182	2.164	1.493	1.493	2.507	0.391	2.27	2.262	0.472	1.245	1.252	0.191	1.168	1.168
MQ2	NCG/mushy	47.8196	19.0055	8.52489	9.7274	0.0210615	0.168492	12.9277	1.24363	0.160469	0.401171	100		36.01	0.483	188.1	158.6	0.161	41.5	66.81	34.36	35.76	63.79	12.7	1.081	247.3	12.15	17.84	0.765	0.041	44.33	2.657	6.596	1.024	4.846	1.389	1.391	0.473	0.47	1.801	0.308	1.921	1.906	0.409	1.14	1.138	0.182	1.15	1.167
MQ35	NCG/mushy	48.9266	20.4886	8.87938	5.96058	0.0549962	0.173988	12.8491	1.98986	0.13999	0.536962	100		40.33	0.662	240.8	36.01	0.168	30.34	12.74	34.31	36.47	74.48	16.32	0.568	259.5	17.77	12.93	1.036	0.029	50.95	4.43	10.33	1.646	7.885	2.214	2.257	0.864	0.862	2.746	0.471	2.933	2.924	0.629	1.757	1.748	0.281	1.795	1.787
MQ67	NCG/mushy	54.3017	19.0999	9.17394	4.27115	0.0962512	0.189495	8.80298	2.76722	0.661727	0.635659	100		20.48	0.775	232.2	4.947	0.182	22.86	6.535	44.25	46.3	78.55	16.94	13.6	273	16.81	22.2	1.945	0.686	126.3	6.923	15.1	2.158	9.233	2.3	2.268	0.793	0.778	2.583	0.436	2.642	2.662	0.575	1.602	1.614	0.263	1.72	1.723
MQ20	NCG/mushy	57.4033	18.3413	8.06136	3.18138	0.132515	0.18773	7.83046	3.23257	0.983827	0.645511	100		16.16	0.796	192.2	0.797	0.179	17.57	2.257	27.87	30.77	82.03	17.24	23.83	282.1	21.55	87.72	2.853	0.99	182.5	10.11	22.11	3.099	13.18	3.114	3.124	0.985	0.984	3.407	0.562	3.388	3.391	0.728	2.09	2.075	0.336	2.22	2.221
MQ78	Lava	49.8196	20.9172	9.93394	4.2544	0.0599634	0.155905	10.8534	2.6184	0.529677	0.857477	100		34.1	1.032	320.8	2.309	0.146	26.65	5.687	85	85.59	79.86	17.77	7.704	285.7	18.56	47.15	1.409	0.11	100.4	3.839	10.31	1.423	6.911	2.08	2.103	0.779	0.773	2.703	0.469	2.989	2.954	0.664	1.852	1.842	0.292	1.909	1.923
MQ18	Lava	58.3928	18.1989	7.75233	2.77842	0.164261	0.175279	7.50193	3.3954	1.01161	0.629	100		14.57	0.765	173.3	1.809	0.167	15.75	2.523	44.8	46.34	80.13	17.27	24.17	327.9	22.75	73.48	3.254	0.494	215.4	14.41	30.06	4.164	17.11	3.773	3.711	1.114	1.107	3.825	0.621	3.71	3.72	0.787	2.209	2.177	0.354	2.283	2.329
MQ66	Lava	62.623	17.3614	6.40315	2.03282	0.187799	0.182804	5.97361	3.8359	0.968963	0.430539	100		9.535	0.522	65.48	0.33	0.172	9.854	0.842	20.21	22.28	83.71	16.99	22.28	287.8	22.97	99.47	3.286	0.852	216.4	13.27	30.92	4.478	19.28	4.436	4.45	1.109	1.114	4.197	0.649	3.695	3.729	0.773	2.103	2.143	0.348	2.358	2.369
[truncated: 39 more columns]

## Sheet: Statia
		XRF													ICP-MS TRACES
		NORMALISED TO 100%, VOLATILE FREE
Sample	Type	SiO2	TiO2	Al2O3	Fe2O3	MnO	MgO	CaO	Na2O	K2O	P2O5	Total		45Sc	49Ti	51V	53Cr	55Mn	59Co	60Ni	63Cu	65Cu	66Zn	71Ga	85Rb	88Sr	89Y	90Zr	93Nb	133Cs	137Ba	139La	140Ce	141Pr	143Nd	147Sm	149Sm	151Eu	153Eu	157Gd	159Tb	161Dy	163Dy	165Ho	166Er	167Er	169Tm	172Yb	174Yb
EU89	Cumulate	43.6116	0.796811	27.7722	5.25597	0.0525462	5.27884	15.6779	1.40461	0.133293	0.0161712	100		43.92	0.695	248.8	2.602	0.062	20.9	11.76	16.8	18.31	14.89	12.74	0.791	403.8	9.114	9.169	0.253	0.022	19.5737	0.573	1.68	0.278	1.997	0.839	0.834	0.417	0.418	1.352	0.243	1.569	1.577	0.336	0.894	0.9	0.138	0.783	0.785
EU98	Cumulate	44.2965	1.28673	18.537	14.7657	0.199031	6.94006	12.8949	1.03804	0.0327621	0.00922262	100		50	1.319	645.2	10.87	0.216	40.66	11.67	32.79	34.8	79.86	19.07	0.494	215.5	12.14	7.949	0.203	0.095	14.3832	0.854	2.084	0.365	2.535	1.033	1.017	0.524	0.526	1.609	0.3	1.976	1.98	0.436	1.209	1.19	0.202	1.229	1.225
EU54	Cumulate	40.5264	1.43405	23.4236	11.6673	0.079835	6.30006	15.1939	1.28117	0.0833717	0.010302	100		47.41	1.445	628	4.014	0.09	35.04	18.86	80.73	82.29	24.83	13.45	0.292	284.5	10.3	6.878	0.304	0.006	15.9591	0.317	1.044	0.209	1.723	0.871	0.886	0.462	0.469	1.544	0.285	1.824	1.808	0.388	1.02	1.039	0.155	0.865	0.883
EU23	Cumulate	43.6082	1.08272	22.7434	10.1232	0.0992045	5.67848	15.0503	1.45775	0.135065	0.0216711	100		43.43	1.106	481.2	6.415	0.111	28.55	9.235	23.15	24.94	32.47	14.66	1.216	338.5	12.32	14.71	0.386	0.037	24.4639	0.899	2.567	0.427	2.996	1.181	1.178	0.533	0.54	1.819	0.321	2.068	2.086	0.449	1.204	1.208	0.191	1.114	1.107
EU24	Cumulate	41.8318	1.54246	20.4313	13.254	0.114308	7.3693	13.2898	1.97032	0.173092	0.0237184	100		55.56	1.594	726.6	2.876	0.128	41.38	17.02	100	101.9	35.93	15.14	1.194	305.2	15.97	15.92	0.449	0.034	27.4531	0.914	2.75	0.479	3.53	1.477	1.494	0.658	0.654	2.361	0.429	2.711	2.716	0.589	1.595	1.589	0.25	1.437	1.429
EU93	Cumulate	42.2521	0.388498	21.3369	8.90837	0.109211	13.3667	12.8693	0.709745	0.0510245	0.00817125	100		26.84	0.33	112.5	39.81	0.123	51.74	86.65	8.154	8.998	26.26	8.708	0.241	243.2	4.674	3.933	0.092	0.006	8.45106	0.242	0.753	0.134	1.011	0.444	0.457	0.24	0.244	0.72	0.129	0.836	0.83	0.175	0.468	0.469	0.072	0.408	0.41
EU91	Cumulate	44.6644	1.3505	20.9902	9.13772	0.107637	8.04484	13.3731	2.09291	0.210039	0.028714	100		67.19	1.38	458.8	6.905	0.119	32.43	15.7	31.09	32.99	29.2	13.34	1.636	313.4	17.9	19.56	0.561	0.048	33.1439	1.183	3.413	0.589	4.197	1.687	1.701	0.723	0.722	2.644	0.473	3.061	3.063	0.657	1.769	1.775	0.277	1.598	1.601
EU22	Cumulate	43.9287	1.14047	22.793	11.4417	0.182514	5.26736	13.579	1.54815	0.0985951	0.0205591	100		25.45	1.173	311.8	1.294	0.206	22.4	2.173	24.74	26.5	44.16	15.87	1.194	330.5	17.31	17.56	0.663	0.045	26.0649	1.139	3.532	0.619	4.491	1.754	1.756	0.861	0.854	2.582	0.461	2.915	2.923	0.629	1.714	1.726	0.28	1.645	1.668
EU52	Cumulate	43.5426	1.29653	21.2317	10.205	0.102907	7.54591	14.1287	1.75243	0.171605	0.0226269	100		59.86	1.308	505.8	3.301	0.116	34.99	14.13	70.13	70.39	27.84	13.64	1.296	320.5	14.87	15.6	0.422	0.044	26.5776	0.911	2.671	0.46	3.29	1.375	1.384	0.603	0.608	2.169	0.391	2.506	2.51	0.536	1.442	1.444	0.23	1.315	1.301
EU62	Cumulate	41.9909	1.56139	20.0078	13.7802	0.174614	7.31222	13.3319	1.67135	0.132614	0.0370418	100		61.06	1.584	598.7	15.42	0.193	35.74	23.48	19.4	21.86	47.24	16.86	0.687	262.5	18.25	21.25	0.824	0.016	31.9182	1.378	4.418	0.783	5.516	2.032	2.039	0.868	0.868	2.894	0.498	3.106	3.106	0.654	1.766	1.758	0.277	1.595	1.599
EU92	Cumulate	44.4474	0.792869	20.9405	6.7822	0.0787254	9.14028	16.6034	1.10875	0.0945748	0.011318	100		68.96	0.686	310.8	33.72	0.09	31.81	23.83	12.47	13.73	19.58	10.3	0.57	295.1	9.717	8.732	0.176	0.016	13.7829	0.452	1.427	0.259	1.929	0.88	0.882	0.422	0.414	1.453	0.263	1.724	1.695	0.364	0.965	0.956	0.149	0.824	0.835
EU75	Cumulate	43.8299	0.437527	31.1128	3.0452	0.0341121	2.87062	17.5482	1.08284	0.0337219	0.00511396	100		19.57	0.364	82.29	3.377	0.041	9.602	2.963	2.328	3.695	10.09	11.31	0.125	379.3	5.995	2.964	0.09	0.003	6.37488	0.173	0.603	0.122	1.037	0.517	0.529	0.356	0.361	0.894	0.161	1.043	1.047	0.222	0.599	0.599	0.091	0.502	0.514
EU95	Cumulate	46.1782	1.29864	18.3614	13.8494	0.216268	6.08628	12.1828	1.76884	0.0457168	0.0124794	100		50.84	1.298	454.7	8.893	0.228	32.7	5.351	27.96	30.19	92.03	19.48	1.177	239	17.19	11.66	0.307	0.144	21.037	1.603	3.499	0.584	3.927	1.53	1.524	0.782	0.78	2.315	0.434	2.826	2.847	0.614	1.733	1.719	0.289	1.74	1.766
EU99	Dacite Lava	59.0136	0.776027	17.7494	7.91489	0.167419	2.6174	7.01178	3.97483	0.647149	0.12749	100		20.85	0.713	134.4	1.895	0.171	16.63	3.256	59.8	59.9	64.43	17.64	8.857	197.6	32.41	90.6	2.316	0.051	165.719	6.028	14.32	2.044	11.92	3.53	3.571	1.136	1.124	4.632	0.795	5.008	5	1.083	3.106	3.06	0.527	3.249	3.268
EU2	NCG/mushy	51.5653	0.861036	19.3949	10.1775	0.261736	4.61507	9.84556	2.95559	0.257319	0.0659328	100		28.31	0.829	181.7	1.996	0.282	21.85	5.389	30.79	32.09	63.26	17.15	4.429	320.5	37.27	50.03	1.854	0.17	71.2156	3.319	10.05	1.693	11.46	3.915	3.952	1.397	1.393	5.277	0.926	5.858	5.884	1.275	3.63	3.624	0.608	3.762	3.792
EU7	NCG/mushy	57.9752	0.703975	18.0407	7.58351	0.172727	3.39483	7.92038	3.51928	0.5751	0.114299	100		18.61	0.601	138	11.72	0.185	16.53	7.287	29.2	29.93	45.4	15.41	10.81	292.6	23.56	77.86	2.005	0.394	133.951	4.925	12.21	1.681	9.497	2.679	2.668	0.962	0.967	3.313	0.571	3.586	3.574	0.782	2.222	2.253	0.388	2.45	2.461
EU65	NCG/mushy	51.6275	1.01384	19.1658	8.51109	0.150547	5.98691	10.3311	2.78991	0.358802	0.0644581	100		37.66	1.04	268.7	74.71	0.161	27.77	34.52	41.06	42.24	44.08	14.77	6.279	233.4	27.07	54.68	1.608	0.239	80.2457	3.049	8.265	1.267	8.136	2.745	2.774	1	1.006	3.855	0.679	4.358	4.349	0.942	2.635	2.639	0.434	2.658	2.672
EU74	NCG/mushy	46.5494	0.882954	19.4757	9.15359	0.133017	8.51668	13.2061	1.83103	0.199114	0.0523913	100		48.84	0.882	329.3	178.1	0.146	37.19	63.63	63.24	63.52	49.97	15.14	3.247	209.5	17.08	30.78	1.004	0.127	43.037	1.902	4.887	0.733	4.69	1.684	1.69	0.689	0.683	2.444	0.437	2.797	2.788	0.601	1.67	1.663	0.272	1.651	1.655
[truncated: 38 more columns]

## Sheet: Standard Data
ICP-MS TRACES
		45Sc	49Ti	51V	53Cr	55Mn	59Co	60Ni	63Cu	65Cu	66Zn	71Ga	85Rb	88Sr	89Y	90Zr	93Nb	133Cs	137Ba	139La	140Ce	141Pr	143Nd	147Sm	149Sm	151Eu	153Eu	157Gd	159Tb	161Dy	163Dy	165Ho	166Er	167Er	169Tm	172Yb	174Yb	175Lu	177Hf	178Hf	181Ta	206Pb	207Pb	208Pb	232Th	238U
W2	Average	33.236	1.1524	331.18	89.068	0.1618	43.146	70.772	102.96	103.7	76.95	16.444	19.268	226.1	22.22	89.194	7.9838	0.833	192.8	11.406	24.142	3.2808	13.934	3.3732	3.4002	1.1182	1.102	3.9046	0.6378	3.7792	3.7908	0.7856	2.0988	2.092	0.3242	2.0002	2.0122	0.3228	2.4422	2.4426	0.5012	7.8808	8.0044	7.9634	2.264	0.4872
n=6	Ref.	35.9	1.06	268	93	0.167	45	72	105	105	77	18	21	196	22	92	7.5	0.92	172	10.8	23.4	3	13	3.3	3.3	1.08	1.08	3.66	0.62	3.79	3.79	0.79	2.22	2.22	0.33	2.05	2.05	0.31	2.45	2.45	0.47	7.7	7.7	7.7	2.17	0.51
	Offset	7.42061	-8.71698	-23.5746	4.22796	3.11377	4.12	1.70556	1.94286	1.2381	0.0649351	8.64444	8.24762	-15.3571	-1	3.05	-6.45067	9.45652	-12.093	-5.61111	-3.17094	-9.36	-7.18462	-2.21818	-3.03636	-3.53704	-2.03704	-6.68306	-2.87097	0.28496	-0.0211082	0.556962	5.45946	5.76577	1.75758	2.42927	1.8439	-4.12903	0.318367	0.302041	-6.6383	-2.34805	-3.95325	-3.42078	-4.3318	4.47059
	2 sd	2.87511	20.901	9.24239	3.58976	1.83342	3.73757	2.07535	4.24827	3.0188	2.79435	2.69585	2.44799	2.77124	1.90619	1.98527	1.16928	1.60164	1.04767	0.534734	0.993082	1.49968	1.18622	1.67878	1.79059	1.7859	1.23758	0.470292	0.780803	1.7744	1.39658	1.48009	1.36338	2.11301	1.10355	1.38983	0.780731	1.10834	2.13033	1.37816	2.02295	1.40011	0.891068	0.580257	1.45022	1.67757
BHVO-1	Average	30.32	2.7125	311.75	287.8	0.1685	44.16	117.65	135.9	136.7	106.7	20.325	9.1425	396.85	27.28	172.55	20.1	0.094	145.2	15.965	38.55	5.789	26.47	6.3415	6.334	2.1145	2.102	6.545	0.9875	5.3295	5.336	0.9955	2.405	2.4105	0.343	1.987	1.9885	0.3045	4.5	4.469	1.2835	2.141	2.1675	2.1765	1.2735	0.418
n=2	Ref.	31	2.75	318	287	0.17	45	118	137	137	106	21	9.19	396	26	174	18.6	0.101	133	15.5	38.1	5.42	24.7	6.12	6.12	2.09	2.09	6.33	0.96	5.31	5.31	0.98	2.55	2.55	0.33	2	2	0.27	4.46	4.46	1.21	2.4	2.4	2.4	1.23	0.409
	Offset	2.19355	1.36364	1.96541	-0.278746	0.882353	1.86667	0.29661	0.80292	0.218978	-0.660377	3.21429	0.516866	-0.214646	-4.92308	0.833333	-8.06452	6.93069	-9.17293	-3	-1.1811	-6.80812	-7.16599	-3.61928	-3.49673	-1.17225	-0.574163	-3.39652	-2.86458	-0.367232	-0.489642	-1.58163	5.68627	5.47059	-3.93939	0.65	0.575	-12.7778	-0.896861	-0.201794	-6.07438	10.7917	9.6875	9.3125	-3.53659	-2.20049
	2 sd	12.2204	4.22309	2.22282	4.22593	7.55366	9.92768	3.24554	5.20314	3.93124	0.530164	8.41918	7.93537	6.09375	4.66566	1.06548	7.31732	15.0448	8.96058	16.3877	15.1877	9.38086	7.15922	4.92851	4.86736	2.60839	0.941912	3.93257	1.57533	0.822603	2.49131	1.56267	1.05846	0.880033	0	4.98213	2.77367	0.464438	4.58834	2.78476	4.95829	3.30269	0.587217	3.70366	5.66352	2.02997
AGV-1	Average	11.59	1.153	149.3	8.3195	0.093	14.885	14.695	56.19	57.815	88.555	19.855	65.78	656.3	20.02	232.25	15.315	1.2015	1303.5	40.115	70.545	9.081	33.93	5.9135	5.9295	1.607	1.5945	4.913	0.6705	3.5485	3.536	0.676	1.7215	1.725	0.262	1.6115	1.6155	0.2635	5.1105	5.129	0.92	36.41	36.345	36.245	6.5345	1.8775
n=2	Ref.	12.3	1.05	119	9.4	0.097	15.2	15.5	58	58	87	20.2	66.6	660	19	231	14.6	1.26	1200	38.2	67.6	8.3	31.7	5.72	5.72	1.58	1.58	4.7	0.69	3.55	3.55	0.68	1.82	1.82	0.28	1.63	1.63	0.244	5.1	5.1	0.87	37.4	37.4	37.4	6.4	1.93
	Offset	5.77236	-9.80952	-25.4622	11.4947	4.12371	2.07237	5.19355	3.12069	0.318966	-1.78736	1.70792	1.23123	0.560606	-5.36842	-0.541126	-4.89726	4.64286	-8.625	-5.01309	-4.35651	-9.40964	-7.0347	-3.38287	-3.66259	-1.70886	-0.917722	-4.53191	2.82609	0.0422535	0.394366	0.588235	5.41209	5.21978	6.42857	1.13497	0.889571	-7.9918	-0.205882	-0.568627	-5.74713	2.64706	2.82086	3.08824	-2.10156	2.72021
	2 sd	13.1782	33.8528	2.84169	1.17292	3.04132	7.1257	1.05862	5.93975	1.73673	0.590886	8.04866	5.84777	0.905028	1.13024	0.669811	6.37158	9.53402	18.3354	12.0921	11.086	8.03584	4.25139	1.50665	2.26579	1.76007	3.81381	2.36038	1.0546	0.278977	0.879884	0.836813	2.54665	2.13157	2.1591	4.30012	4.46456	2.68352	0.581127	1.21321	2.4595	2.71889	2.5292	1.67778	3.83068	2.1844
